# Supplementary material for: Respiratory viruses dynamics and interactions: ten years of surveillance in central Europe
Source: Springer Nature journal article supplement (doi:10.1186/s12889-022-13555-5), 2022-06-11
Supplement: MOESM1 [file 23152316]

**Additional File 1 - Supplementary Material**

Gibrán Horemheb-Rubio, PhD<sup>\*1,2</sup>, Ralf Eggeling, PhD<sup>\*3</sup>, Norbert Schmeisser, Dr. rer. medic<sup>4</sup>, Nico Pfeifer, Dr. rer. Nat.<sup>3,5,6,7</sup>, Thomas Lengauer, PhD<sup>1,7</sup>, Barbara C. Gärtner, MD<sup>8</sup>, Christiane Prifert, M.sc.<sup>9</sup>, Matthias Kochanek, MD<sup>10</sup>, Christoph Scheid<sup>10</sup>, MD and Ortwin Adams, MD<sup>11\*\*</sup>, Rolf Kaiser, PhD<sup>1\*\*</sup>. On behalf of the Respiratory Virus Network

\*Contributed equally

\*\*Also contributed equally

<sup>1</sup>Institute of Virology, Faculty of Medicine and University Hospital Cologne, Fürst-Pückler-Straße 56, 50935 Cologne, Germany, <sup>2</sup>Department of Infectious Diseases, Instituto Nacional de Ciencias Médicas y Nutrición Salvador Zubirán, Vasco de Quiroga 15, 14080 Mexico City, Mexico, <sup>3</sup>Methods in Medical Informatics, Department of Computer Science, University of Tübingen, Sand 14, 72076 Tübingen, Germany, <sup>4</sup>Medeora GmbH, Am Gleisdreieck 1, 50823 Cologne, Germany, <sup>5</sup>Faculty of Medicine, University of Tübingen, 72076 Tübingen, Germany, <sup>6</sup>German Center for Infection Research, Partner Site Tübingen, 72076 Tübingen, Germany, <sup>7</sup>Computational Biology, Max Planck Institute for Informatics, Saarland Informatics Campus, 66123 Saarbrücken, Germany, <sup>8</sup>Institute of Medicine Microbiology and Hygiene, University of the Saarland Kirrberger- Straße Building 43, 66421 Homburg/Saar, <sup>9</sup>Faculty of Medicine, Institute for Virology and Immunobiology, Würzburg University, Sanderring 2, 97070 Würzburg, Germany, <sup>10</sup>University of Cologne, Department of Internal Medicine, Center for Integrated Oncology Aachen Bonn Cologne Düsseldorf, Kerpener Straße 62, 50937 Cologne, Germany, <sup>11</sup>University of Düsseldorf, Medical Faculty, Institute for Virology, 40225 Düsseldorf, Germany

**Table of contents**

1.- Methods

- 1.1 Definition of the coinfection exclusion score
- 1.2 Definition of the average coinfection exclusion score (ACES)

2.- Figure S1

3.- Figure S2

4.- Figure S3

5.- Figure S4

6.- Table S1

7.- Table S2

# 1. Methods

## 1.1 Definition of the coinfection exclusion score

Let  $X_i \in \{0,1\}$  denote a binary random variable that assume a value of 1 if the test result for pathogen  $i$  is positive. To assess the rate of coinfection among pathogens  $i$  and  $j$  in a given time interval, we apply the following procedure. First, we consider only patients for whom a result (positive or negative) is available for both  $i$  and  $j$ .

We carry out a chi-square test to assess the statistical independence of  $X_i$  and  $X_j$ . We use a significance threshold  $\alpha=0.05$  and Bonferroni correction.

For all cases in which statistical independence is rejected, we compute  $p_{ij} = \hat{P}(X_i = 1, X_j = 1)$ , the empirical joint probability of a positive result for both tests. We further compute  $p_i = \hat{P}(X_i = 1)$  and  $p_j = \hat{P}(X_j = 1)$ , the empirical marginal probabilities of a positive result for each of the two tests. The product  $p_i \cdot p_j$  quantifies the expected coinfection frequency under the assumption that both pathogens infect independently.

Finally, we define the *coinfection exclusion score* (CES) as

$$\text{CES}_{ij} = -\log_{10} \left( \frac{p_{ij}}{p_i \cdot p_j} \right)$$

The score assumes a value of 1 if coinfections are ten times less likely than expected by chance, and a value of -1 if they are ten times as likely as expected by chance.

## 1.2 Definition of the average coinfection exclusion score (ACES)

In order to exclude bias due to seasonal effects that may create artificially high or low coinfection frequencies, we calculate the CES for the entire datasets stratified by months. As a consequence, the Bonferroni correction is based on a number of  $12 \cdot 197 = 2364$  chi-square tests that are carried out. Subsequently we compute weighted average of the resulting CES values for each virus pair with the following quantity that we call the *average coinfection exclusion score* (ACES)

$$\text{ACES}_{ij} = \frac{\sum_{m=1}^{12} \text{CES}_{ij}^m \cdot s_{ij}^m \cdot N_{ij}^m}{\sum_{m=1}^{12} s_{ij}^m \cdot N_{ij}^m}$$

Here  $\text{CES}_{ij}^m$  denotes the coinfection exclusion score of the  $m$ -th month,  $N_{ij}^m$  denotes the total number of patients with test results for pathogens  $i$  and  $j$  in month  $m$ , and

$$s_{ij}^m = \begin{cases} 0, & \text{if } \text{CES}_{ij}^m \text{ undefined or } \text{CES}_{ij}^m = \infty \\ 1, & \text{otherwise} \end{cases}$$

is a selection variable which excludes all months for which statistical independence was not rejected (indicated by an undefined CES) or where at least one pathogen has zero positive tests (infinite CES).

**Figure S1. Groups by seasonality profiles by the total number of positives**

**Group 1: "Winter Peak"**

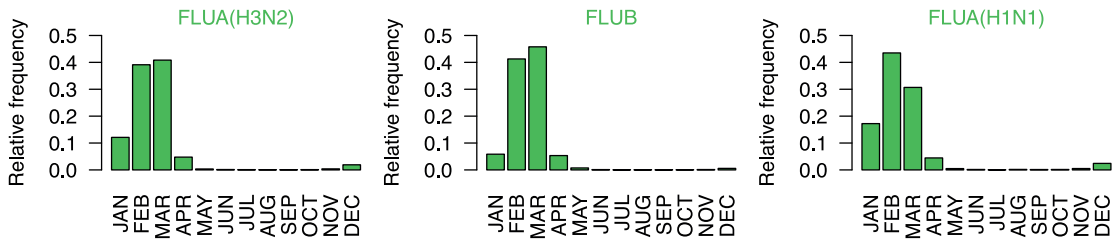

**Group 2: "Winter/Spring Peak"**

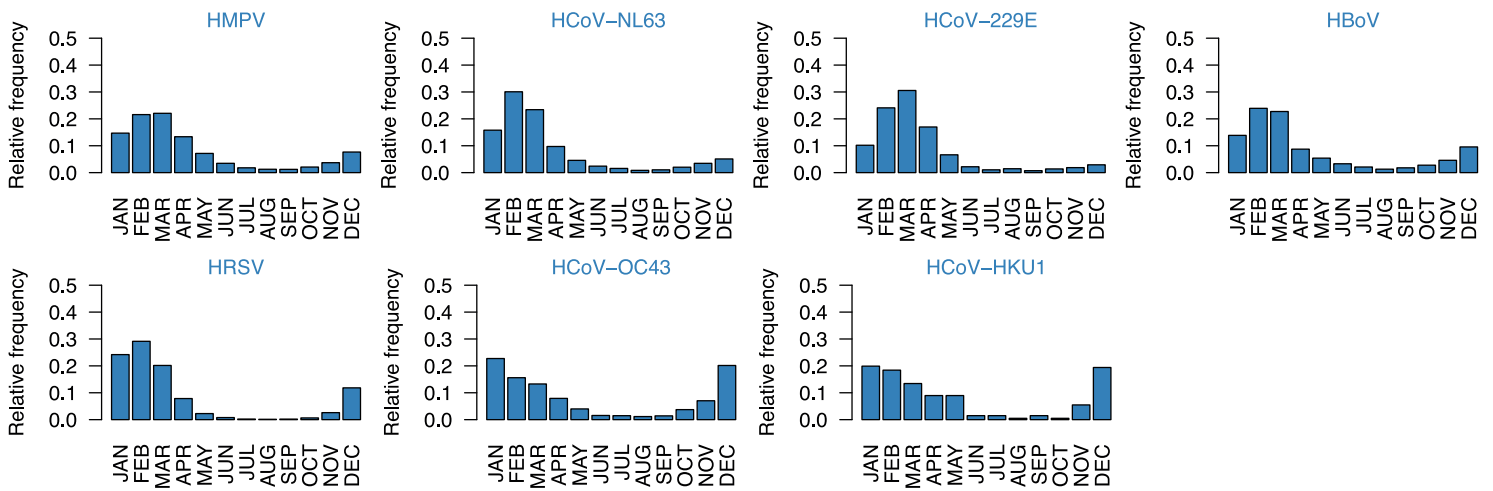

**Group 3: "Autumn Peak"**

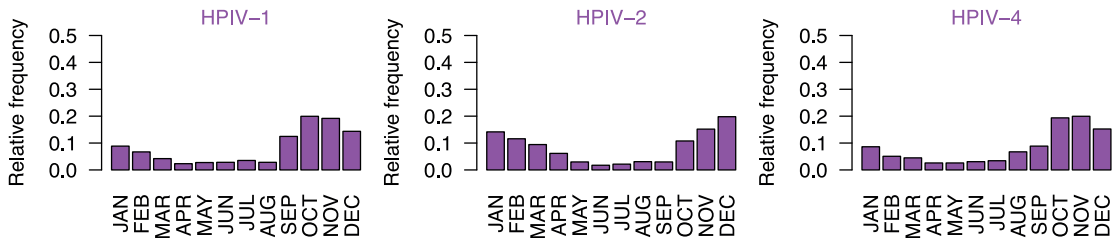

**Group 4: "Perennial"**

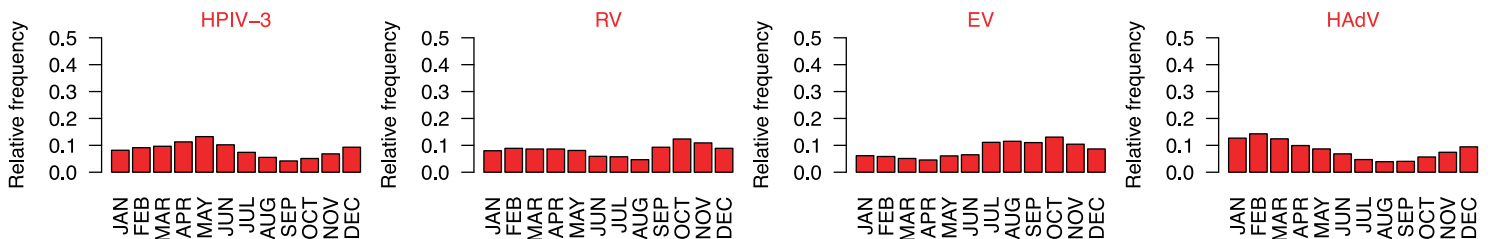

**Figure S1. Groups by seasonality profiles by the total number of positives.** The figure shows the four seasonal groups according to the similarities of the 17 viruses, calculated by the total number of positives.

**Figure S2. Groups by seasonality profiles by the positivity rate**

**Group 1: "Winter Peak"**

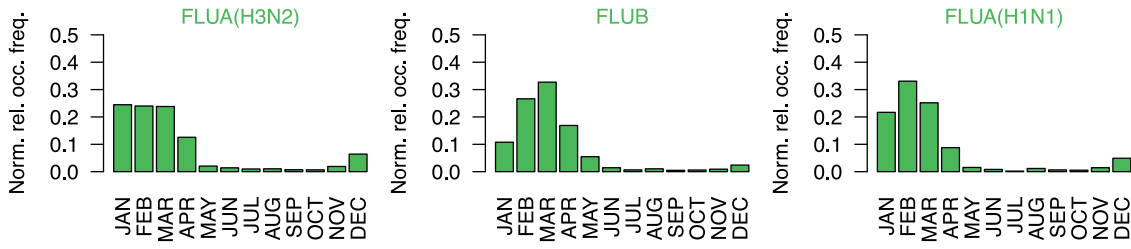

**Group 2: "Winter/Spring Peak"**

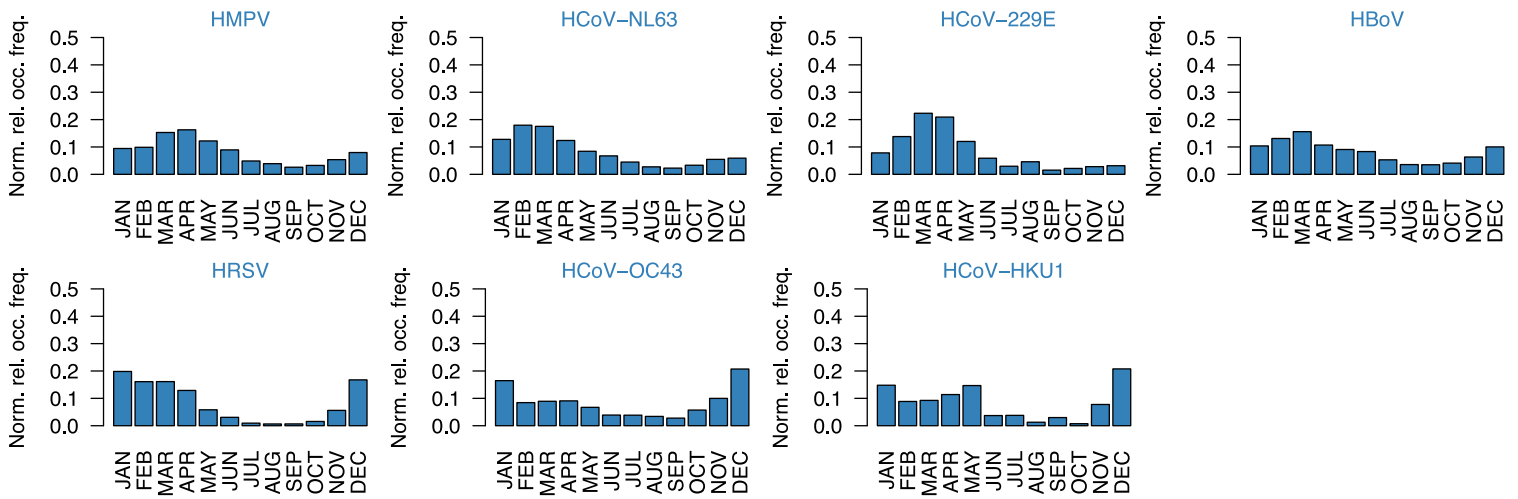

**Group 3: "Autumn Peak"**

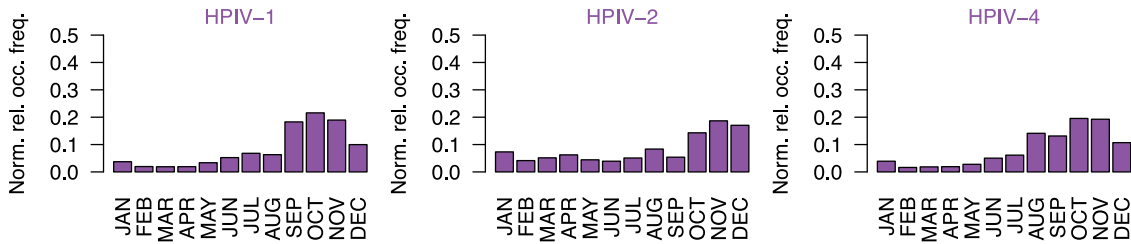

**Group 4: "Perennial"**

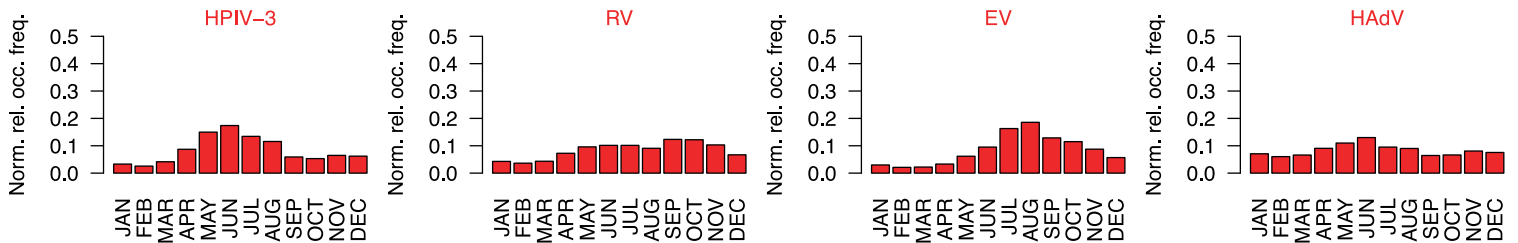

**Figure S2. Groups by seasonality profiles by the positivity rate.** The figure shows the seasonal four groups according to the similarities of the 17 viruses, calculated by the positivity rate.

**Figure S3. Year-specific seasonality profiles**

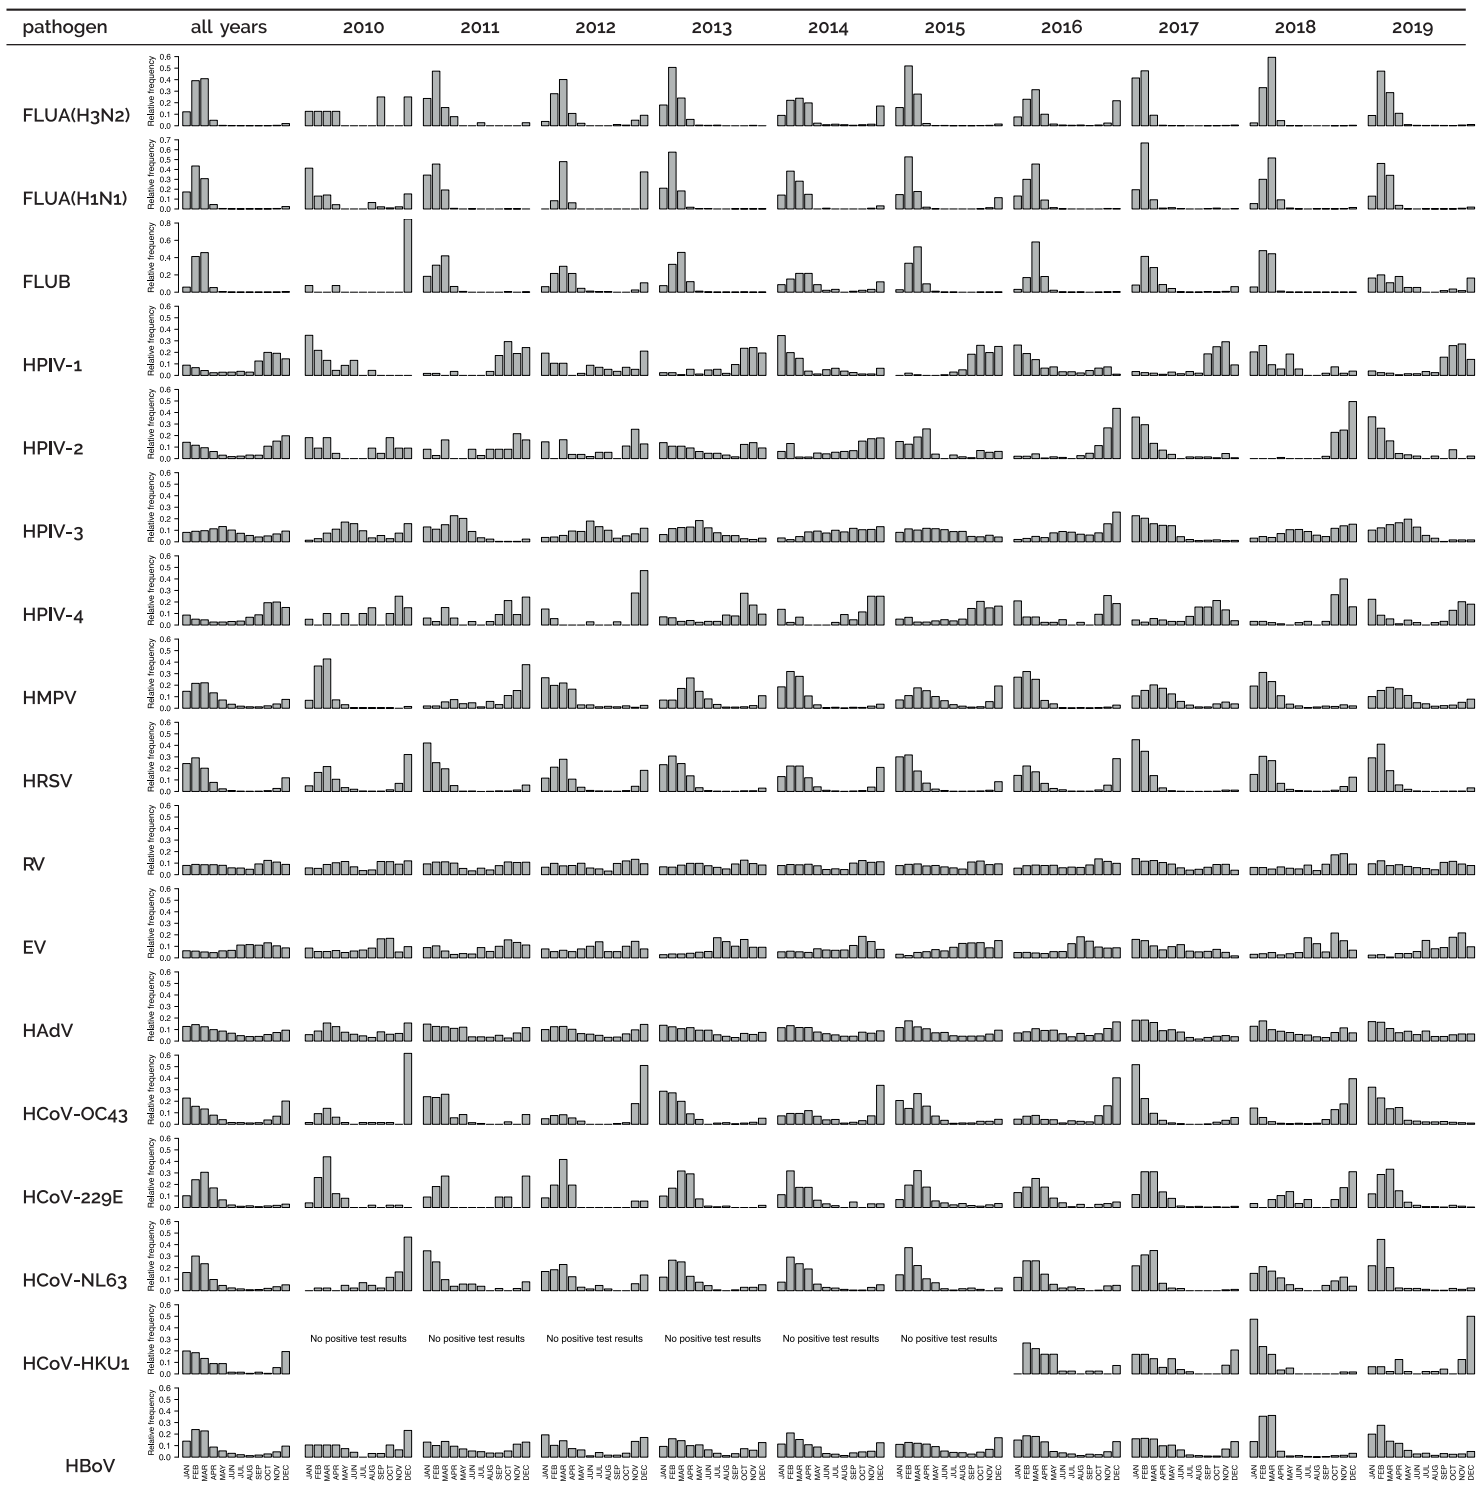

**Figure S3. Year-specific seasonality profiles.** The figure shows the stratified frequency of positive tests for each pathogen by year.

**Figure S4. Hierarchical clustering of virus seasonality profiles per year**

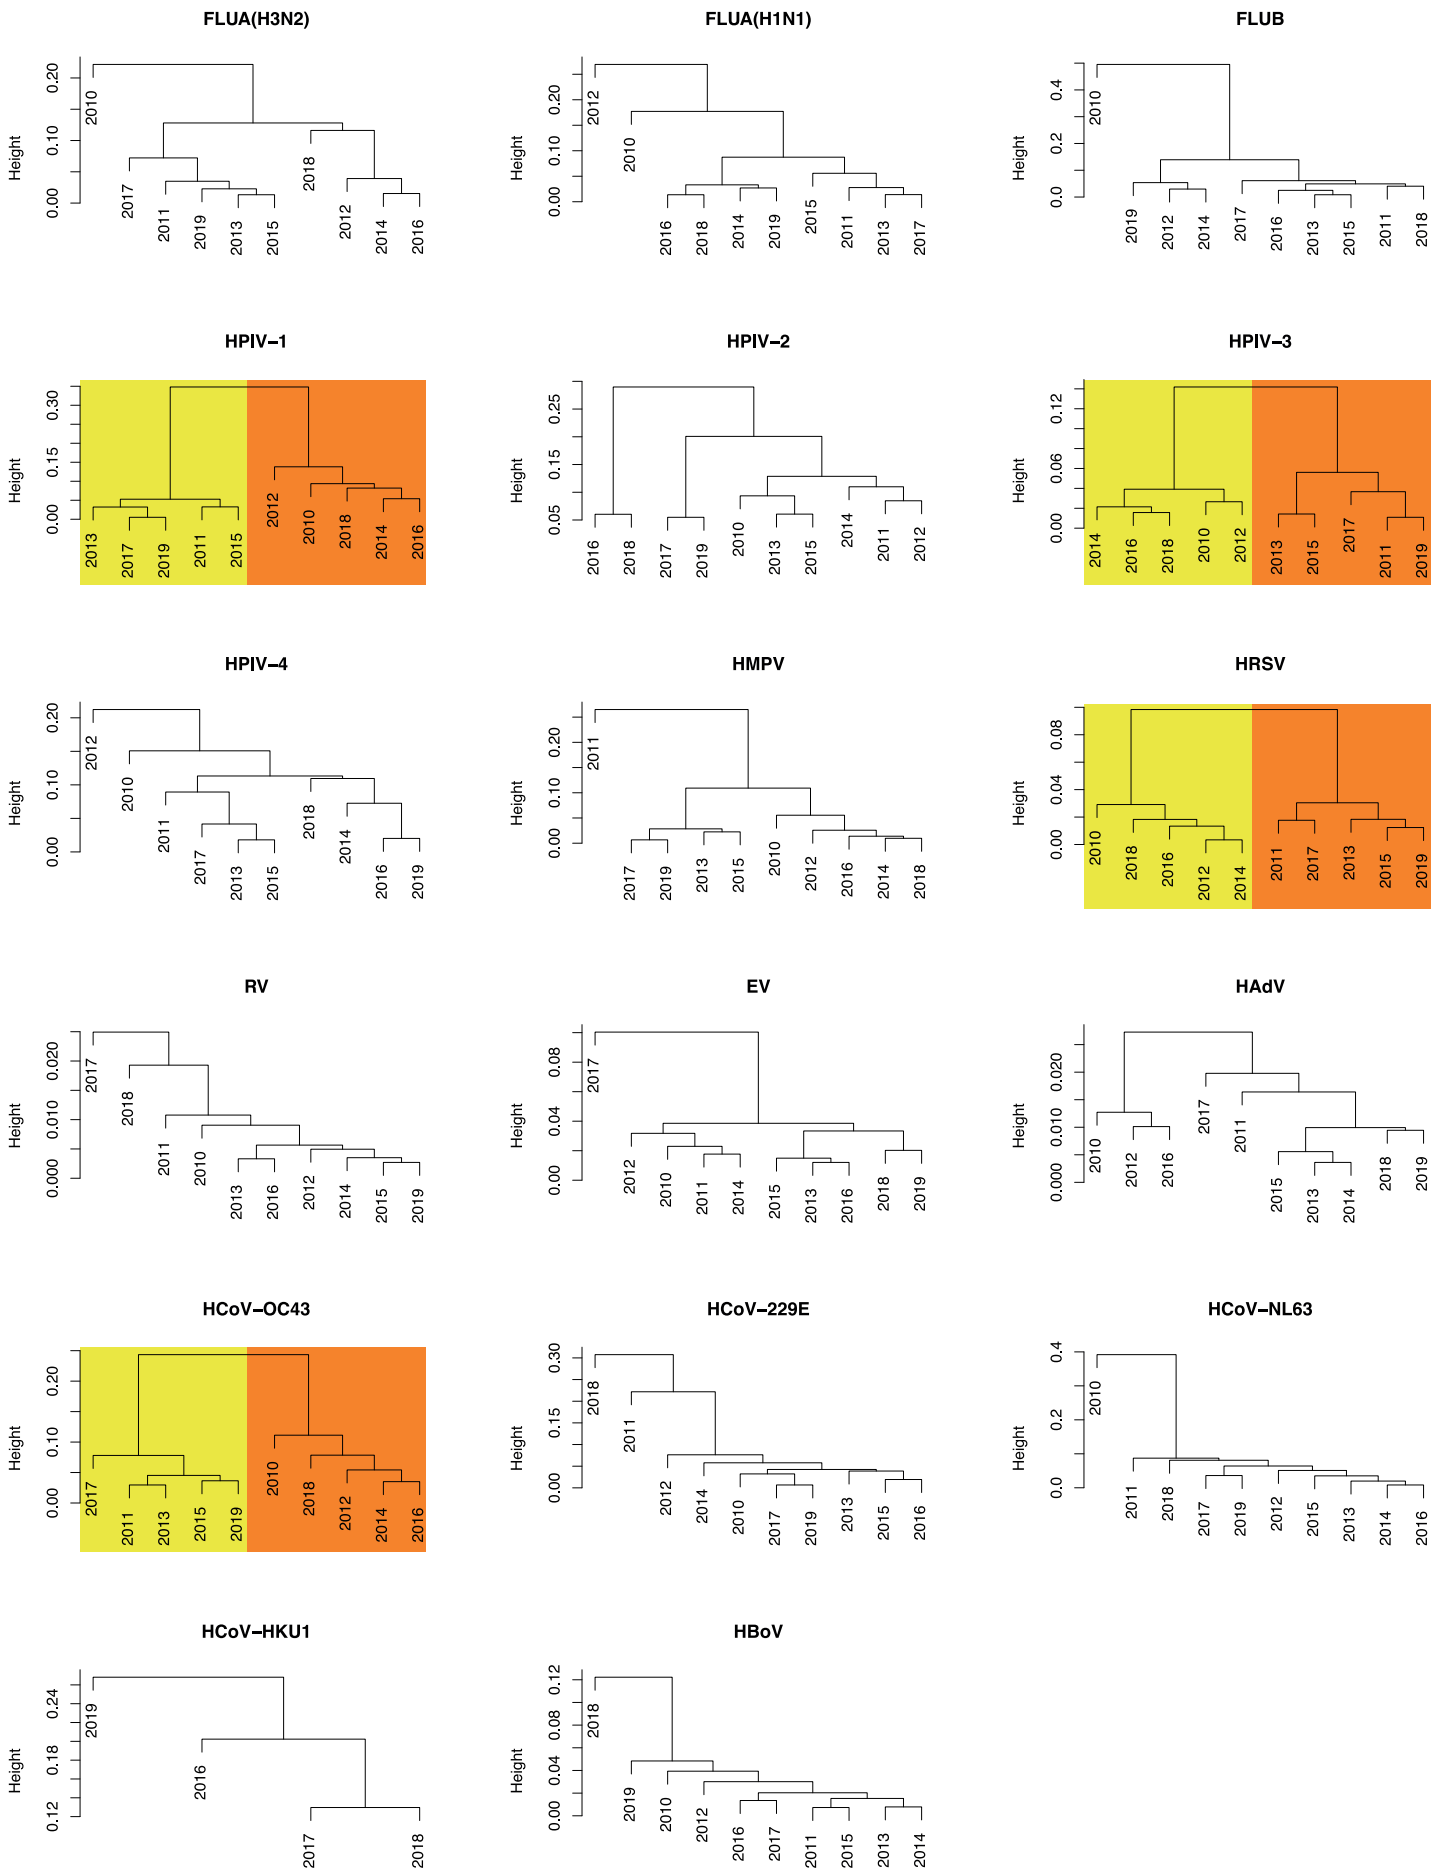

**Figure S4. Hierarchical clustering of virus seasonality profiles per year.** The figure shows the hierarchical clustering with average linkage to the ten profiles of each virus. The viruses that exhibit a biennial pattern are colored in orange and yellow.

**6. Table S1. Coinfection Prevalence of Respiratory Viruses**

| Coinfection Prevalence of Respiratory Viruses |           |           |                          |                          |             |             |                    |                          |
|-----------------------------------------------|-----------|-----------|--------------------------|--------------------------|-------------|-------------|--------------------|--------------------------|
| Virus 1                                       | Virus 2   | Negatives | Monoinfection<br>Virus 1 | Monoinfection<br>Virus 2 | Coinfection | Total Tests | Positivity<br>Rate | Coinfection<br>Frequency |
| RV                                            | HBoV      | 41,529    | 11,888                   | 1,984                    | 312         | 55,713      | 0.560%             | 4.6%                     |
| RV                                            | HAdV      | 34,286    | 9,717                    | 1,957                    | 281         | 46,241      | 0.608%             | 4.2%                     |
| HRSV                                          | HBoV      | 46,230    | 8,620                    | 2,145                    | 273         | 57,268      | 0.477%             | 4.0%                     |
| HRSV                                          | HAdV      | 53,789    | 12,072                   | 4,748                    | 267         | 70,876      | 0.377%             | 3.9%                     |
| HRSV                                          | HCoV-OC43 | 48,916    | 9,772                    | 1,982                    | 226         | 60,896      | 0.371%             | 3.3%                     |
| HPIV-3                                        | RV        | 42,973    | 3,008                    | 14,326                   | 222         | 60,529      | 0.367%             | 3.3%                     |
| HAdV                                          | HBoV      | 54,103    | 3,931                    | 2,299                    | 194         | 60,527      | 0.321%             | 2.9%                     |
| HRSV                                          | RV        | 17,425    | 4,509                    | 6,747                    | 183         | 28,864      | 0.634%             | 2.7%                     |
| HMPV                                          | RV        | 43,660    | 3,033                    | 14,602                   | 162         | 61,457      | 0.264%             | 2.4%                     |
| RV                                            | EV        | 33,397    | 8,033                    | 1,260                    | 154         | 42,844      | 0.359%             | 2.3%                     |
| FLUA-generic                                  | HRSV      | 34,664    | 10,971                   | 7,680                    | 154         | 53,469      | 0.288%             | 2.3%                     |
| HMPV                                          | HAdV      | 67,098    | 4,020                    | 5,055                    | 153         | 76,326      | 0.200%             | 2.3%                     |
| RV                                            | HCoV-OC43 | 41,381    | 12,879                   | 1,857                    | 150         | 56,267      | 0.267%             | 2.2%                     |
| HRSV                                          | HCoV-NL63 | 49,981    | 9,737                    | 1,150                    | 135         | 61,003      | 0.221%             | 2.0%                     |
| FLUA(H3N2)                                    | HRSV      | 32,247    | 3,279                    | 7,565                    | 131         | 43,222      | 0.303%             | 1.9%                     |
| FLUB                                          | HRSV      | 61,309    | 4,490                    | 14,106                   | 123         | 80,028      | 0.154%             | 1.8%                     |
| HMPV                                          | HRSV      | 65,281    | 4,022                    | 13,276                   | 113         | 82,692      | 0.137%             | 1.7%                     |
| HMPV                                          | HBoV      | 56,802    | 3,229                    | 2,511                    | 112         | 62,654      | 0.179%             | 1.7%                     |
| HPIV-3                                        | HRSV      | 60,927    | 3,423                    | 12,076                   | 111         | 76,537      | 0.145%             | 1.6%                     |
| HRSV                                          | HCoV-229E | 48,078    | 9,785                    | 875                      | 106         | 58,844      | 0.180%             | 1.6%                     |
| HPIV-3                                        | HAdV      | 60,185    | 3,458                    | 4,910                    | 105         | 68,658      | 0.153%             | 1.6%                     |
| FLUA(H3N2)                                    | FLUB      | 60,762    | 9,918                    | 15,976                   | 103         | 86,759      | 0.119%             | 1.5%                     |
| FLUB                                          | RV        | 40,365    | 2,542                    | 15,275                   | 79          | 58,261      | 0.136%             | 1.2%                     |
| EV                                            | HAdV      | 53,283    | 2,874                    | 3,320                    | 79          | 59,556      | 0.133%             | 1.2%                     |
| HRSV                                          | EV        | 46,587    | 9,685                    | 3,080                    | 78          | 59,430      | 0.131%             | 1.2%                     |
| HAdV                                          | HCoV-OC43 | 56,251    | 4,321                    | 2,210                    | 77          | 62,859      | 0.122%             | 1.1%                     |
| RV                                            | HCoV-NL63 | 41,510    | 12,823                   | 1,094                    | 75          | 55,502      | 0.135%             | 1.1%                     |
| HPIV-1                                        | RV        | 45,266    | 711                      | 14,422                   | 74          | 60,473      | 0.122%             | 1.1%                     |
| FLUB                                          | HAdV      | 59,014    | 3,072                    | 5,062                    | 73          | 67,221      | 0.109%             | 1.1%                     |
| HPIV-3                                        | HBoV      | 51,872    | 2,846                    | 2,923                    | 65          | 57,706      | 0.113%             | 1.0%                     |
| FLUA(H1N1)                                    | HRSV      | 38,890    | 2,214                    | 8,896                    | 64          | 50,064      | 0.128%             | 0.9%                     |
| RV                                            | HCoV-229E | 39,598    | 13,037                   | 880                      | 59          | 53,574      | 0.110%             | 0.9%                     |
| HPIV-3                                        | HCoV-OC43 | 57,152    | 3,229                    | 2,153                    | 59          | 62,593      | 0.094%             | 0.9%                     |

|              |            |        |       |        |    |        |        |      |
|--------------|------------|--------|-------|--------|----|--------|--------|------|
| HPIV-2       | RV         | 45,057 | 629   | 14,234 | 58 | 59,978 | 0.097% | 0.9% |
| HCoV-OC43    | HBoV       | 52,232 | 1,992 | 2,923  | 57 | 57,204 | 0.100% | 0.8% |
| EV           | HBoV       | 50,848 | 3,124 | 2,773  | 56 | 56,801 | 0.099% | 0.8% |
| HPIV-4       | RV         | 29,007 | 471   | 9,770  | 55 | 39,303 | 0.140% | 0.8% |
| HAdV         | HCoV-NL63  | 55,534 | 4,203 | 1,230  | 55 | 61,022 | 0.090% | 0.8% |
| FLUA-generic | HAdV       | 32,933 | 3,580 | 2,188  | 51 | 38,752 | 0.132% | 0.8% |
| FLUA(H3N2)   | HCoV-OC43  | 34,527 | 3,070 | 1,354  | 46 | 38,997 | 0.118% | 0.7% |
| FLUA(H3N2)   | HBoV       | 36,425 | 3,030 | 3,230  | 44 | 42,729 | 0.103% | 0.7% |
| FLUB         | HBoV       | 47,018 | 2,459 | 2,380  | 44 | 51,901 | 0.085% | 0.7% |
| HPIV-3       | EV         | 51,523 | 3,100 | 3,365  | 41 | 58,029 | 0.071% | 0.6% |
| HMPV         | HCoV-OC43  | 57,345 | 3,354 | 2,254  | 40 | 62,993 | 0.063% | 0.6% |
| FLUA(H3N2)   | RV         | 26,052 | 2,599 | 8,959  | 38 | 37,648 | 0.101% | 0.6% |
| FLUA(H3N2)   | HAdV       | 38,889 | 3,328 | 3,136  | 36 | 45,389 | 0.079% | 0.5% |
| HPIV-2       | HRSV       | 62,990 | 790   | 12,092 | 36 | 75,908 | 0.047% | 0.5% |
| FLUA(H1N1)   | HAdV       | 46,368 | 2,274 | 3,693  | 34 | 52,369 | 0.065% | 0.5% |
| HCoV-NL63    | HBoV       | 52,803 | 1,163 | 2,458  | 34 | 56,458 | 0.060% | 0.5% |
| FLUB         | HMPV       | 65,708 | 3,786 | 3,832  | 32 | 73,358 | 0.044% | 0.5% |
| HPIV-3       | RV/EV      | 6,504  | 306   | 1,721  | 31 | 8,562  | 0.362% | 0.5% |
| FLUA(H3N2)   | HMPV       | 39,854 | 3,354 | 2,499  | 30 | 45,737 | 0.066% | 0.4% |
| EV           | HCoV-OC43  | 51,141 | 3,355 | 2,003  | 29 | 56,528 | 0.051% | 0.4% |
| HMPV         | EV         | 55,321 | 3,130 | 3,152  | 29 | 61,632 | 0.047% | 0.4% |
| HPIV-3       | HMPV       | 67,857 | 3,454 | 3,593  | 29 | 74,933 | 0.039% | 0.4% |
| FLUA(H3N2)   | FLUA(H1N1) | 43,265 | 3,852 | 2,881  | 28 | 50,026 | 0.056% | 0.4% |
| FLUA(H1N1)   | HMPV       | 47,297 | 2,269 | 2,927  | 27 | 52,520 | 0.051% | 0.4% |
| HPIV-3       | HCoV-229E  | 54,586 | 3,077 | 949    | 27 | 58,639 | 0.046% | 0.4% |
| HAdV         | HCoV-229E  | 53,658 | 4,260 | 977    | 27 | 58,922 | 0.046% | 0.4% |
| HPIV-generic | RV         | 9,126  | 473   | 2,853  | 26 | 12,478 | 0.208% | 0.4% |
| FLUA-generic | HMPV       | 35,844 | 9,467 | 2,137  | 26 | 47,474 | 0.055% | 0.4% |
| HMPV         | HCoV-NL63  | 56,649 | 3,195 | 1,262  | 26 | 61,132 | 0.043% | 0.4% |
| HPIV-1       | HAdV       | 62,760 | 921   | 4,972  | 25 | 68,678 | 0.036% | 0.4% |
| FLUA-generic | RV         | 22,726 | 2,768 | 7,176  | 24 | 32,694 | 0.073% | 0.4% |
| HCoV-OC43    | HCoV-229E  | 55,805 | 2,149 | 955    | 24 | 58,933 | 0.041% | 0.4% |
| FLUA-generic | HBoV       | 26,974 | 2,467 | 1,110  | 21 | 30,572 | 0.069% | 0.3% |
| FLUA(H3N2)   | HCoV-229E  | 31,836 | 3,019 | 571    | 21 | 35,447 | 0.059% | 0.3% |
| HMPV         | HCoV-229E  | 54,841 | 3,174 | 989    | 21 | 59,025 | 0.036% | 0.3% |
| FLUB         | HCoV-OC43  | 49,569 | 2,557 | 2,079  | 20 | 54,225 | 0.037% | 0.3% |
| HPIV-2       | HAdV       | 62,399 | 801   | 4,911  | 20 | 68,131 | 0.029% | 0.3% |
| HRSV         | RV/EV      | 4,083  | 388   | 561    | 19 | 5,051  | 0.376% | 0.3% |
| FLUB         | RV/EV      | 6,309  | 503   | 1,742  | 19 | 8,573  | 0.222% | 0.3% |
| HPIV-1       | HBoV       | 53,934 | 670   | 2,970  | 19 | 57,593 | 0.033% | 0.3% |



|              |              |        |       |        |    |        |        |      |
|--------------|--------------|--------|-------|--------|----|--------|--------|------|
| HPIV-3       | HCoV-NL63    | 56,224 | 3,112 | 1,249  | 19 | 60,604 | 0.031% | 0.3% |
| FLUA-generic | EV           | 24,341 | 2,385 | 1,772  | 18 | 28,516 | 0.063% | 0.3% |
| FLUA(H3N2)   | HPIV-3       | 36,105 | 3,293 | 2,099  | 18 | 41,515 | 0.043% | 0.3% |
| FLUA(H1N1)   | HBoV         | 44,006 | 1,918 | 2,130  | 18 | 48,072 | 0.037% | 0.3% |
| HRSV         | HCoV-generic | 6,126  | 752   | 524    | 17 | 7,419  | 0.229% | 0.3% |
| FLUA(H1N1)   | HCoV-OC43    | 42,369 | 2,026 | 1,747  | 17 | 46,159 | 0.037% | 0.3% |
| FLUB         | HCoV-NL63    | 48,554 | 2,489 | 1,148  | 17 | 52,208 | 0.033% | 0.3% |
| HPIV-2       | HBoV         | 53,397 | 662   | 2,967  | 17 | 57,043 | 0.030% | 0.3% |
| FLUA-generic | HCoV-OC43    | 28,820 | 2,492 | 1,179  | 16 | 32,507 | 0.049% | 0.2% |
| HPIV-4       | EV           | 35,675 | 502   | 2,768  | 16 | 38,961 | 0.041% | 0.2% |
| FLUA-generic | HPIV-3       | 32,711 | 9,311 | 1,674  | 16 | 43,712 | 0.037% | 0.2% |
| HPIV-4       | HAdV         | 41,441 | 606   | 3,153  | 16 | 45,216 | 0.035% | 0.2% |
| FLUA(H1N1)   | RV           | 33,256 | 1,754 | 11,315 | 16 | 46,341 | 0.035% | 0.2% |
| HCoV-OC43    | HCoV-NL63    | 57,623 | 2,126 | 1,252  | 16 | 61,017 | 0.026% | 0.2% |
| HPIV-1       | RV/EV        | 6,619  | 97    | 1,735  | 15 | 8,466  | 0.177% | 0.2% |
| FLUA-generic | HCoV-229E    | 26,094 | 2,469 | 518    | 15 | 29,096 | 0.052% | 0.2% |
| FLUA-generic | HCoV-NL63    | 28,167 | 2,366 | 589    | 15 | 31,137 | 0.048% | 0.2% |
| FLUA(H1N1)   | HCoV-NL63    | 42,421 | 1,993 | 1,059  | 15 | 45,488 | 0.033% | 0.2% |
| HPIV-4       | RV/EV        | 6,714  | 93    | 1,738  | 14 | 8,559  | 0.164% | 0.2% |
| HPIV-generic | HRSV         | 10,695 | 782   | 2,803  | 14 | 14,294 | 0.098% | 0.2% |
| FLUA(H3N2)   | HCoV-NL63    | 34,467 | 3,080 | 829    | 14 | 38,390 | 0.036% | 0.2% |
| HPIV-4       | HRSV         | 37,738 | 585   | 7,008  | 14 | 45,345 | 0.031% | 0.2% |
| HPIV-1       | EV           | 53,767 | 759   | 3,385  | 14 | 57,925 | 0.024% | 0.2% |
| HCoV-229E    | HCoV-NL63    | 55,971 | 948   | 1,231  | 14 | 58,164 | 0.024% | 0.2% |
| HPIV-2       | HCoV-OC43    | 59,550 | 742   | 2,190  | 14 | 62,496 | 0.022% | 0.2% |
| HPIV-2       | HMPV         | 69,852 | 796   | 3,600  | 14 | 74,262 | 0.019% | 0.2% |
| HPIV-1       | HMPV         | 70,276 | 917   | 3,604  | 14 | 74,811 | 0.019% | 0.2% |
| FLUB         | HCoV-229E    | 46,866 | 2,378 | 888    | 13 | 50,145 | 0.026% | 0.2% |
| RV/EV        | HAdV         | 4,382  | 557   | 89     | 12 | 5,040  | 0.238% | 0.2% |
| RV/EV        | HCoV-OC43    | 6,191  | 1,552 | 194    | 12 | 7,949  | 0.151% | 0.2% |
| EV           | HCoV-NL63    | 50,221 | 3,335 | 1,139  | 12 | 54,707 | 0.022% | 0.2% |
| HPIV-1       | HCoV-NL63    | 58,670 | 732   | 1,253  | 12 | 60,667 | 0.020% | 0.2% |
| HPIV-1       | HRSV         | 63,351 | 911   | 12,153 | 12 | 76,427 | 0.016% | 0.2% |
| HCoV-HKU1    | HBoV         | 14,194 | 135   | 1,070  | 11 | 15,410 | 0.071% | 0.2% |
| HCoV-NL63    | HCoV-HKU1    | 16,504 | 295   | 125    | 11 | 16,935 | 0.065% | 0.2% |
| HPIV-4       | HMPV         | 42,336 | 610   | 2,541  | 11 | 45,498 | 0.024% | 0.2% |
| FLUB         | EV           | 45,694 | 2,195 | 3,294  | 11 | 51,194 | 0.021% | 0.2% |
| FLUA-generic | HCoV-generic | 6,404  | 413   | 452    | 10 | 7,279  | 0.137% | 0.1% |
| RV/EV        | HCoV-NL63    | 6,255  | 1,554 | 130    | 10 | 7,949  | 0.126% | 0.1% |
| FLUA-generic | HPIV-generic | 11,372 | 947   | 586    | 10 | 12,915 | 0.077% | 0.1% |

|              |              |        |       |       |    |        |        |      |
|--------------|--------------|--------|-------|-------|----|--------|--------|------|
| HMPV         | HCoV-HKU1    | 15877  | 867   | 146   | 10 | 16,900 | 0.059% | 0.1% |
| HPIV-4       | HBoV         | 36,680 | 492   | 2,159 | 10 | 39,341 | 0.025% | 0.1% |
| FLUA(H3N2)   | HPIV-2       | 37,024 | 3,353 | 515   | 10 | 40,902 | 0.024% | 0.1% |
| HPIV-2       | EV           | 53,836 | 667   | 3,390 | 10 | 57,903 | 0.017% | 0.1% |
| FLUA(H3N2)   | RV/EV        | 5,220  | 246   | 1,297 | 9  | 6,772  | 0.133% | 0.1% |
| HRSV         | HCoV-HKU1    | 14,654 | 1,970 | 127   | 9  | 16,760 | 0.054% | 0.1% |
| FLUA(H1N1)   | HPIV-3       | 43,277 | 2,218 | 2,657 | 9  | 48,161 | 0.019% | 0.1% |
| EV           | HCoV-229E    | 48,402 | 3,371 | 921   | 9  | 52,703 | 0.017% | 0.1% |
| FLUA(H1N1)   | FLUB         | 52,444 | 3,619 | 4,372 | 9  | 60,444 | 0.015% | 0.1% |
| HPIV-2       | HPIV-3       | 71,873 | 812   | 3,528 | 9  | 76,222 | 0.012% | 0.1% |
| HPIV-generic | HCoV-generic | 6,586  | 144   | 450   | 8  | 7,188  | 0.111% | 0.1% |
| FLUA(H3N2)   | HPIV-4       | 25,332 | 2,359 | 385   | 8  | 28,084 | 0.028% | 0.1% |
| FLUA(H1N1)   | HCoV-229E    | 39,845 | 1,914 | 803   | 8  | 42,570 | 0.019% | 0.1% |
| HPIV-2       | HPIV-4       | 43,804 | 519   | 579   | 8  | 44,910 | 0.018% | 0.1% |
| HAdV         | HCoV-HKU1    | 15,226 | 1,404 | 147   | 7  | 16,784 | 0.042% | 0.1% |
| FLUA(H3N2)   | EV           | 34,325 | 2,977 | 2,071 | 7  | 39,380 | 0.018% | 0.1% |
| HPIV-1       | HPIV-4       | 44,274 | 606   | 597   | 7  | 45,484 | 0.015% | 0.1% |
| HPIV-3       | HPIV-4       | 42,489 | 2,481 | 596   | 7  | 45,573 | 0.015% | 0.1% |
| FLUB         | HPIV-3       | 60,763 | 3,778 | 3,241 | 7  | 67,789 | 0.010% | 0.1% |
| HPIV-1       | HPIV-3       | 72,299 | 919   | 3,532 | 7  | 76,757 | 0.009% | 0.1% |
| RV/EV        | HCoV-229E    | 3,429  | 1,512 | 60    | 6  | 5,007  | 0.120% | 0.1% |
| HMPV         | RV/EV        | 4,321  | 154   | 581   | 6  | 5,062  | 0.119% | 0.1% |
| FLUA(H1N1)   | RV/EV        | 5,033  | 435   | 1,302 | 6  | 6,776  | 0.089% | 0.1% |
| FLUB         | HCoV-generic | 6,405  | 471   | 532   | 6  | 7,414  | 0.081% | 0.1% |
| HMPV         | HCoV-generic | 6,628  | 281   | 535   | 6  | 7,450  | 0.081% | 0.1% |
| RV/EV        | HCoV-HKU1    | 6,355  | 1,556 | 29    | 6  | 7,946  | 0.076% | 0.1% |
| FLUB         | HPIV-generic | 16,926 | 2,326 | 826   | 6  | 20,084 | 0.030% | 0.1% |
| HPIV-4       | HCoV-229E    | 38,345 | 499   | 726   | 6  | 39,576 | 0.015% | 0.1% |
| HPIV-4       | HCoV-OC43    | 41,369 | 558   | 1,590 | 6  | 43,523 | 0.014% | 0.1% |
| FLUA(H1N1)   | HPIV-2       | 44,682 | 2,179 | 623   | 6  | 47,490 | 0.013% | 0.1% |
| RV           | HCoV-HKU1    | 8,871  | 2,630 | 116   | 5  | 11,622 | 0.043% | 0.1% |
| FLUB         | HCoV-HKU1    | 15,666 | 887   | 127   | 5  | 16,685 | 0.030% | 0.1% |
| FLUA-generic | HPIV-2       | 33,836 | 9,320 | 450   | 5  | 43,611 | 0.011% | 0.1% |
| HCoV-229E    | HBoV         | 50,451 | 935   | 2,937 | 5  | 54,328 | 0.009% | 0.1% |
| HPIV-2       | HCoV-NL63    | 58,688 | 715   | 1,261 | 5  | 60,669 | 0.008% | 0.1% |
| HPIV-1       | HCoV-OC43    | 59,496 | 794   | 2,203 | 5  | 62,498 | 0.008% | 0.1% |
| HAdV         | HCoV-generic | 6,591  | 287   | 537   | 4  | 7,419  | 0.054% | 0.1% |
| FLUA(H1N1)   | HPIV-4       | 33,349 | 1,906 | 508   | 4  | 35,767 | 0.011% | 0.1% |
| HPIV-generic | RV/EV        | 3,313  | 16    | 245   | 3  | 3,577  | 0.084% | 0.0% |
| HCoV-generic | HBoV         | 5,338  | 272   | 160   | 3  | 5,773  | 0.052% | 0.0% |

|              |              |        |       |       |   |        |        |      |
|--------------|--------------|--------|-------|-------|---|--------|--------|------|
| HPIV-3       | HCoV-generic | 5,784  | 220   | 336   | 3 | 6,343  | 0.047% | 0.0% |
| HPIV-2       | RV/EV        | 6,605  | 104   | 1,747 | 3 | 8,459  | 0.035% | 0.0% |
| HPIV-generic | HAdV         | 12,336 | 547   | 647   | 3 | 13,533 | 0.022% | 0.0% |
| HPIV-generic | HMPV         | 12,414 | 740   | 698   | 3 | 13,855 | 0.022% | 0.0% |
| HPIV-2       | HCoV-229E    | 56,958 | 717   | 972   | 3 | 58,650 | 0.005% | 0.0% |
| HPIV-2       | HCoV-HKU1    | 16,479 | 194   | 132   | 2 | 16,807 | 0.012% | 0.0% |
| HPIV-4       | HCoV-NL63    | 41,200 | 511   | 872   | 2 | 42,585 | 0.005% | 0.0% |
| FLUA-generic | HPIV-1       | 33,827 | 9,326 | 458   | 2 | 43,613 | 0.005% | 0.0% |
| FLUA(H1N1)   | EV           | 42,343 | 1,771 | 2,445 | 2 | 46,561 | 0.004% | 0.0% |
| HPIV-1       | HCoV-229E    | 56,935 | 731   | 972   | 2 | 58,640 | 0.003% | 0.0% |
| FLUB         | HPIV-2       | 62,609 | 3,776 | 770   | 2 | 67,157 | 0.003% | 0.0% |
| FLUB         | HPIV-1       | 63,087 | 3,780 | 824   | 2 | 67,693 | 0.003% | 0.0% |
| RV           | HCoV-generic | 4,089  | 601   | 87    | 1 | 4,778  | 0.021% | 0.0% |
| HPIV-generic | HCoV-NL63    | 6,934  | 134   | 76    | 1 | 7,145  | 0.014% | 0.0% |
| FLUA-generic | RV/EV        | 6,064  | 283   | 1,430 | 1 | 7,778  | 0.013% | 0.0% |
| HPIV-generic | HBoV         | 7,888  | 226   | 250   | 1 | 8,365  | 0.012% | 0.0% |
| FLUA-generic | HCoV-HKU1    | 10,554 | 544   | 92    | 1 | 11,191 | 0.009% | 0.0% |
| FLUA(H1N1)   | HCoV-HKU1    | 11,227 | 790   | 110   | 1 | 12,128 | 0.008% | 0.0% |
| FLUA(H3N2)   | HCoV-HKU1    | 11,583 | 669   | 115   | 1 | 12,368 | 0.008% | 0.0% |
| HPIV-4       | HCoV-HKU1    | 16,414 | 178   | 134   | 1 | 16,727 | 0.006% | 0.0% |
| HPIV-1       | HCoV-HKU1    | 16,498 | 183   | 133   | 1 | 16,815 | 0.006% | 0.0% |
| HPIV-3       | HCoV-HKU1    | 16,049 | 725   | 133   | 1 | 16,908 | 0.006% | 0.0% |
| FLUB         | HPIV-4       | 40,956 | 1,964 | 589   | 1 | 43,510 | 0.002% | 0.0% |
| FLUA(H1N1)   | HPIV-1       | 45,138 | 2,225 | 683   | 1 | 48,047 | 0.002% | 0.0% |
| HPIV-1       | HPIV-2       | 74,498 | 916   | 819   | 1 | 76,234 | 0.001% | 0.0% |
| FLUA(H3N2)   | HPIV-1       | 37,515 | 3,366 | 576   | 0 | 41,457 | 0.000% | 0.0% |
| FLUA(H3N2)   | HPIV-generic | 11,207 | 1,171 | 178   | 0 | 12,556 | 0.000% | 0.0% |
| FLUA(H3N2)   | HCoV-generic | 4,171  | 472   | 80    | 0 | 4,723  | 0.000% | 0.0% |
| FLUA(H1N1)   | HPIV-generic | 11,290 | 1,089 | 185   | 0 | 12,564 | 0.000% | 0.0% |
| FLUA(H1N1)   | HCoV-generic | 4,355  | 283   | 79    | 0 | 4,717  | 0.000% | 0.0% |
| FLUA-generic | HPIV-4       | 23,298 | 2,305 | 349   | 0 | 25,952 | 0.000% | 0.0% |
| HPIV-1       | HCoV-generic | 5,835  | 75    | 339   | 0 | 6,249  | 0.000% | 0.0% |
| HPIV-2       | HCoV-generic | 5,862  | 41    | 339   | 0 | 6,242  | 0.000% | 0.0% |
| HPIV-4       | HCoV-generic | 5,948  | 57    | 338   | 0 | 6,343  | 0.000% | 0.0% |
| HPIV-generic | EV           | 7,832  | 165   | 158   | 0 | 8,155  | 0.000% | 0.0% |
| HPIV-generic | HCoV-OC43    | 6,815  | 140   | 219   | 0 | 7,174  | 0.000% | 0.0% |
| HPIV-generic | HCoV-229E    | 3,999  | 135   | 70    | 0 | 4,204  | 0.000% | 0.0% |
| HPIV-generic | HCoV-HKU1    | 3,144  | 21    | 5     | 0 | 3,170  | 0.000% | 0.0% |
| EV           | HCoV-HKU1    | 9,563  | 1,127 | 110   | 0 | 10,800 | 0.000% | 0.0% |
| EV           | HCoV-generic | 5,379  | 86    | 248   | 0 | 5,713  | 0.000% | 0.0% |

|              |              |                  |                |                |              |                  |        |             |
|--------------|--------------|------------------|----------------|----------------|--------------|------------------|--------|-------------|
| RV/EV        | HCoV-generic | 2,942            | 61             | 1              | 0            | 3,004            | 0.000% | 0.0%        |
| RV/EV        | HBoV         | 2,998            | 80             | 38             | 0            | 3,116            | 0.000% | 0.0%        |
| HCoV-OC43    | HCoV-HKU1    | 16,297           | 500            | 136            | 0            | 16,933           | 0.000% | 0.0%        |
| HCoV-229E    | HCoV-HKU1    | 13,548           | 239            | 131            | 0            | 13,918           | 0.000% | 0.0%        |
| <b>Total</b> |              | <b>6,811,616</b> | <b>484,095</b> | <b>488,407</b> | <b>6,761</b> | <b>7,790,879</b> |        | <b>100%</b> |

**Table S1. Coinfection Prevalence of Respiratory Viruses.** The table shows the 197 valid virus pairs for the coinfection study. Each row pertains to a specific coinfecting virus pair and shows the name of the viruses, the total number of negative outcomes for both viruses, the total number of positives outcomes for each virus, the total number of positive outcomes for both viruses and the total number of tests performed for each virus pair. The table also shows the positivity rate of each coinfection and the frequency of this coinfection among all coinfections.

7. Table S2. Coinfection Interactions

| Average Exclusion Score (ACES) |            |                                                                  |      |      |      |      |      |      |      |      |      |      |      |      |
|--------------------------------|------------|------------------------------------------------------------------|------|------|------|------|------|------|------|------|------|------|------|------|
| Pathogen 1                     | Pathogen 2 | Coinfection Exclusion Score (CES) for every month among 10 years |      |      |      |      |      |      |      |      |      |      |      | ACES |
|                                |            | JAN                                                              | FEB  | MAR  | APR  | MAY  | JUN  | JUL  | AUG  | SEP  | OCT  | NOV  | DEC  |      |
| FLUA(H1N1)                     | FLUB       | 1·36                                                             | 1·59 | 1·95 | x    | x    | x    | x    | x    | x    | x    | x    | x    | 1·67 |
| FLUA(H3N2)                     | FLUB       | 1·35                                                             | 1·48 | 1·29 | 1·53 | x    | x    | x    | x    | x    | x    | x    | x    | 1·39 |
| FLUB                           | HPIV-3     | x                                                                | 1·38 | 1·34 | 1·2  | x    | x    | x    | x    | x    | x    | x    | x    | 1·34 |
| FLUA-generic                   | HMPV       | 1·31                                                             | 1·23 | 1·4  | x    | x    | x    | x    | x    | x    | x    | x    | x    | 1·30 |
| FLUA(H1N1)                     | RV         | 1·14                                                             | 1·16 | 1·56 | 1·34 | x    | x    | x    | x    | x    | x    | x    | x    | 1·29 |
| FLUA(H3N2)                     | FLUA(H1N1) | 0·58                                                             | 1·74 | 1·26 | x    | x    | x    | x    | x    | x    | x    | x    | x    | 1·29 |
| HPIV-3                         | RV/EV      | x                                                                | x    | x    | x    | 1·15 | x    | x    | x    | x    | x    | x    | x    | 1·15 |
| FLUA-generic                   | HRSV       | 1·29                                                             | 1·07 | 0·99 | 1·18 | x    | x    | x    | x    | x    | x    | x    | 1·42 | 1·15 |
| FLUA-generic                   | RV         | 0·91                                                             | 1·25 | 1·2  | ∞    | x    | x    | x    | x    | x    | x    | x    | ∞    | 1·14 |
| FLUA-generic                   | HPIV-3     | 1·29                                                             | 1·11 | 0·95 | x    | x    | x    | x    | x    | x    | x    | x    | 1·27 | 1·14 |
| HPIV-1                         | HRSV       | 0·88                                                             | x    | x    | x    | x    | x    | x    | x    | x    | x    | x    | 1·45 | 1·10 |
| FLUA-generic                   | HPIV-2     | 1·42                                                             | 0·87 | x    | x    | x    | x    | x    | x    | x    | x    | x    | x    | 1·08 |
| FLUA(H3N2)                     | RV         | 1·16                                                             | 0·99 | 1·03 | 0·98 | x    | x    | x    | x    | x    | x    | x    | 1·07 | 1·04 |
| HPIV-generic                   | HRSV       | 1·02                                                             | x    | x    | x    | x    | x    | x    | x    | x    | x    | x    | 1·06 | 1·04 |
| FLUA(H1N1)                     | HCoV-E229  | x                                                                | 1·02 | x    | x    | x    | x    | x    | x    | x    | x    | x    | x    | 1·02 |
| HPIV-3                         | EV         | x                                                                | x    | x    | x    | ∞    | 0·84 | 1·01 | 1·22 | x    | x    | x    | x    | 1·01 |
| FLUA-generic                   | HPIV-1     | 1                                                                | ∞    | x    | x    | x    | x    | x    | x    | x    | x    | x    | x    | 1·00 |
| FLUA(H1N1)                     | HRSV       | 1·01                                                             | 0·9  | 1    | 0·98 | x    | x    | x    | x    | x    | x    | x    | x    | 0·97 |
| FLUA(H1N1)                     | HPIV-3     | x                                                                | 0·95 | x    | x    | x    | x    | x    | x    | x    | x    | x    | x    | 0·95 |
| HPIV-generic                   | RV         | x                                                                | x    | x    | x    | 1·02 | x    | x    | x    | 1·33 | 0·63 | 0·87 | x    | 0·94 |
| FLUB                           | HCoV-E229  | x                                                                | x    | 0·92 | x    | x    | x    | x    | x    | x    | x    | x    | x    | 0·92 |
| FLUB                           | HMPV       | x                                                                | 0·77 | 0·99 | 1·15 | x    | x    | x    | x    | x    | x    | x    | x    | 0·91 |
| FLUA(H3N2)                     | HBoV       | 0·69                                                             | 0·9  | 1·09 | x    | x    | x    | x    | x    | x    | x    | x    | x    | 0·90 |
| FLUB                           | HRSV       | 0·85                                                             | 0·84 | 0·99 | 0·84 | x    | x    | x    | x    | x    | x    | x    | 0·93 | 0·88 |
| FLUA(H3N2)                     | HCoV-NL63  | x                                                                | 0·86 | x    | x    | x    | x    | x    | x    | x    | x    | x    | x    | 0·86 |
| FLUA(H3N2)                     | HMPV       | 0·75                                                             | 1·08 | 0·69 | x    | x    | x    | x    | x    | x    | x    | x    | x    | 0·86 |
| FLUA(H1N1)                     | HCoV-OC43  | x                                                                | 0·85 | x    | x    | x    | x    | x    | x    | x    | x    | x    | x    | 0·85 |
| FLUA(H3N2)                     | HPIV-3     | 0·9                                                              | 0·63 | 1·06 | x    | x    | x    | x    | x    | x    | x    | x    | x    | 0·85 |
| HMPV                           | HRSV       | 0·77                                                             | 0·81 | 0·98 | 0·72 | x    | x    | x    | x    | x    | x    | x    | 0·9  | 0·84 |
| HPIV-3                         | HMPV       | x                                                                | x    | 0·67 | 1·2  | 0·65 | x    | x    | x    | x    | x    | x    | x    | 0·82 |
| FLUA(H1N1)                     | RV/EV      | x                                                                | 0·82 | x    | x    | x    | x    | x    | x    | x    | x    | x    | x    | 0·82 |
| FLUA(H3N2)                     | HRSV       | 0·75                                                             | 0·87 | 0·77 | 1    | x    | x    | x    | x    | x    | x    | x    | 0·71 | 0·81 |
| FLUA-generic                   | HCoV-OC43  | 1·06                                                             | 0·65 | x    | x    | x    | x    | x    | x    | x    | x    | x    | x    | 0·81 |
| FLUA(H1N1)                     | HBoV       | x                                                                | 0·8  | x    | x    | x    | x    | x    | x    | x    | x    | x    | x    | 0·80 |
| FLUB                           | RV         | x                                                                | 0·58 | 0·87 | 0·99 | ∞    | x    | x    | x    | x    | x    | x    | x    | 0·77 |
| FLUA(H1N1)                     | HMPV       | x                                                                | 0·89 | 0·59 | x    | x    | x    | x    | x    | x    | x    | x    | x    | 0·76 |
| FLUA(H3N2)                     | HAdV       | 0·75                                                             | 0·62 | 0·89 | x    | x    | x    | x    | x    | x    | x    | x    | x    | 0·75 |
| HPIV-3                         | HAdV       | x                                                                | x    | x    | x    | 0·87 | 0·47 | x    | x    | x    | x    | x    | x    | 0·71 |
| FLUB                           | HCoV-NL63  | x                                                                | x    | 0·69 | x    | x    | x    | x    | x    | x    | x    | x    | x    | 0·69 |
| HPIV-4                         | RV         | x                                                                | x    | x    | x    | x    | x    | x    | x    | 0·62 | 0·68 | 0·67 | x    | 0·66 |
| HRSV                           | EV         | 0·54                                                             | 0·56 | 0·83 | 1·05 | x    | x    | x    | x    | x    | x    | x    | 0·37 | 0·66 |
| FLUA-generic                   | HBoV       | x                                                                | 0·66 | x    | x    | x    | x    | x    | x    | x    | x    | x    | x    | 0·66 |
| HMPV                           | RV         | 0·88                                                             | 0·37 | 0·51 | 0·62 | 0·6  | 0·99 | 1·31 | x    | x    | 0·85 | 0·53 | 0·64 | 0·65 |

|              |           |      |       |       |      |       |       |       |      |      |       |      |      |       |
|--------------|-----------|------|-------|-------|------|-------|-------|-------|------|------|-------|------|------|-------|
| FLUA(H1N1)   | HAdV      | 0.75 | 0.53  | 0.68  | x    | x     | x     | x     | x    | x    | x     | x    | x    | 0.64  |
| HRSV         | RV        | 0.62 | 0.56  | 0.58  | 0.79 | 0.57  | x     | x     | x    | x    | 0.74  | 0.49 | 0.78 | 0.63  |
| HPIV-3       | RV        | 0.72 | 0.66  | 0.44  | 0.52 | 0.65  | 0.68  | 0.58  | 0.81 | 0.79 | 0.75  | 0.58 | 0.42 | 0.61  |
| HPIV-3       | HRSV      | 0.42 | 0.55  | 0.65  | 0.85 | 0.61  | x     | x     | x    | x    | x     | x    | 0.64 | 0.59  |
| FLUA(H1N1)   | HCoV-NL63 | x    | 0.95  | x     | x    | x     | -1.41 | x     | x    | x    | x     | x    | x    | 0.58  |
| FLUA-generic | HAdV      | 0.75 | 0.44  | 0.62  | x    | x     | x     | x     | x    | x    | x     | x    | x    | 0.58  |
| HPIV-1       | RV        | x    | x     | x     | x    | x     | x     | x     | x    | 0.58 | 0.58  | 0.59 | x    | 0.58  |
| FLUA-generic | HCoV-NL63 | x    | 0.58  | x     | x    | x     | x     | x     | x    | x    | x     | x    | x    | 0.58  |
| RV           | EV        | x    | x     | x     | x    | x     | x     | 0.48  | 0.7  | 0.53 | x     | x    | x    | 0.56  |
| RV           | HCoV-E229 | x    | 0.67  | 0.43  | 0.44 | 0.59  | x     | x     | x    | x    | x     | x    | x    | 0.54  |
| FLUB         | HAdV      | x    | x     | 0.49  | 0.63 | x     | x     | x     | x    | x    | x     | x    | x    | 0.54  |
| FLUA-generic | EV        | x    | 0.53  | x     | x    | x     | x     | x     | x    | x    | x     | x    | x    | 0.53  |
| FLUB         | RV/EV     | x    | 0.52  | x     | x    | x     | x     | x     | x    | x    | x     | x    | x    | 0.52  |
| HRSV         | HAdV      | 0.45 | 0.37  | 0.4   | 0.83 | 0.84  | x     | x     | x    | x    | x     | x    | 0.51 | 0.50  |
| FLUA-generic | HCoV-E229 | x    | 0.5   | x     | x    | x     | x     | x     | x    | x    | x     | x    | x    | 0.50  |
| HPIV-2       | HRSV      | x    | x     | x     | x    | x     | x     | x     | x    | x    | x     | x    | 0.49 | 0.49  |
| HPIV-2       | RV        | x    | x     | x     | x    | x     | x     | x     | x    | x    | 0.47  | 0.5  | x    | 0.48  |
| RV           | HCoV-OC43 | 0.37 | x     | 0.52  | 0.58 | x     | x     | x     | x    | x    | 0.55  | 0.36 | 0.4  | 0.46  |
| RV           | HAdV      | x    | x     | x     | x    | 0.36  | 0.31  | 0.48  | 0.72 | x    | x     | 0.37 | x    | 0.43  |
| FLUA(H3N2)   | HCoV-OC43 | 0.42 | x     | x     | x    | x     | x     | x     | x    | x    | x     | x    | x    | 0.42  |
| HRSV         | HCoV-E229 | 0.57 | 0.3   | x     | x    | x     | x     | x     | x    | x    | x     | x    | x    | 0.42  |
| RV           | HBoV      | x    | X     | x     | x    | x     | x     | x     | x    | x    | x     | 0.39 | 0.35 | 0.37  |
| HRSV         | HCoV-OC43 | 0.3  | 0.36  | 0.4   | x    | x     | x     | x     | x    | x    | x     | X    | 0.19 | 0.33  |
| HRSV         | HCoV-NL63 | x    | 0.29  | 0.33  | x    | x     | x     | x     | x    | x    | x     | x    | x    | 0.31  |
| HAdV         | HBoV      | x    | -0.29 | x     | x    | x     | x     | x     | x    | x    | x     | x    | x    | -0.29 |
| HCoV-NL63    | HCoV-HKU1 | x    | x     | -0.82 | x    | x     | x     | x     | x    | x    | x     | x    | x    | -0.82 |
| HCoV-OC43    | HCoV-E229 | x    | x     | x     | x    | x     | x     | x     | x    | x    | -1.03 | x    | x    | -1.03 |
| HPIV-1       | HCoV-NL63 | x    | x     | x     | x    | x     | x     | -1.12 | x    | x    | x     | x    | x    | -1.12 |
| FLUA(H3N2)   | HPIV-4    | x    | x     | x     | x    | -1.39 | x     | x     | x    | x    | x     | x    | x    | -1.39 |

**Appendix Table 2. Coinfection interactions.** The table shows the 73 coinfections which exhibited at least one month with significant coinfection exclusion score (CES). A positive average coinfection exclusion score (ACES) indicates an exclusion interaction while a positive ACES an affinity interaction. The score assumes a value of 1 if coinfections are ten times less likely than expected by chance and a value of -1 if they are ten times more likely. The X indicates months where the CES were no significant. The symbol ∞ indicates zero coinfections in that month regarding the virus pair.
